# Supplementary figures and images for: Combination of PD98059 and TGF-β1 Efficiently Differentiates Human Urine-Derived Stem Cells into Smooth Muscle Cells
Source: MDPI journal article supplement (doi:10.3390/ijms221910532), 2021-09-29

Supplementary Video. Contraction test

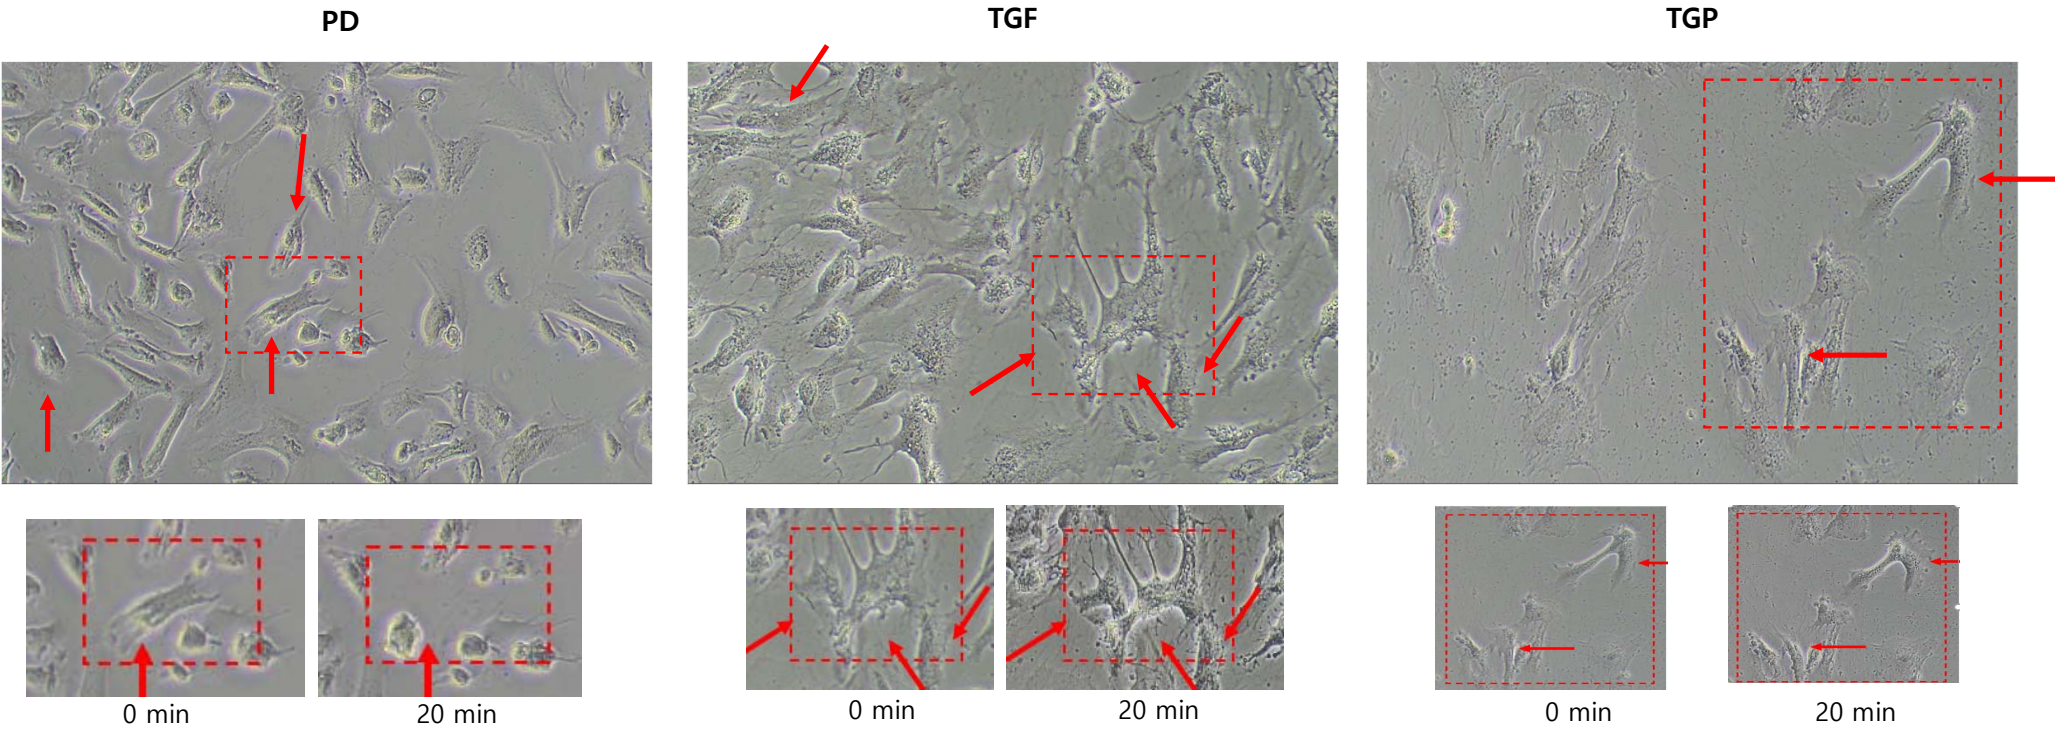

PD

TGF

TGP

0 min

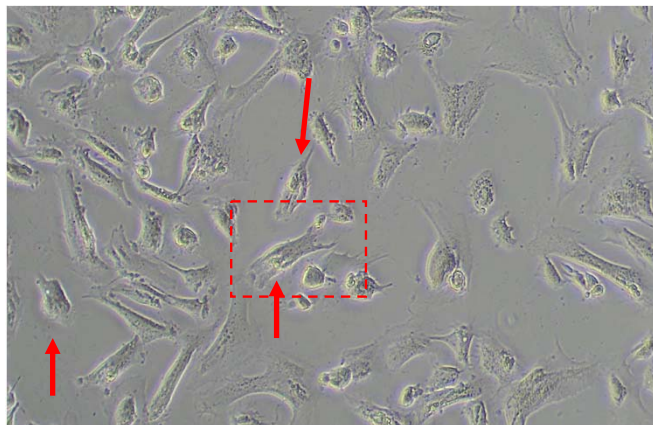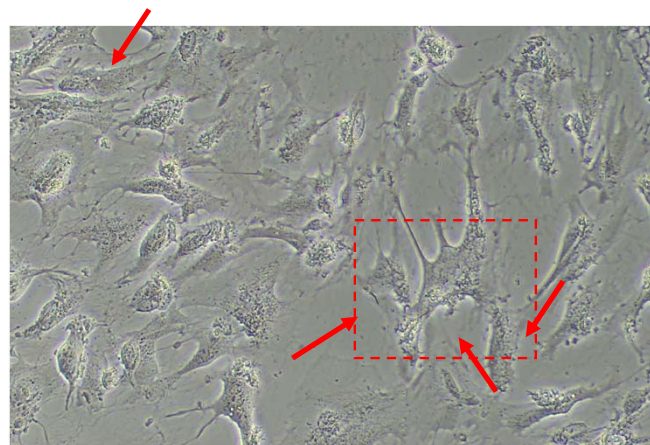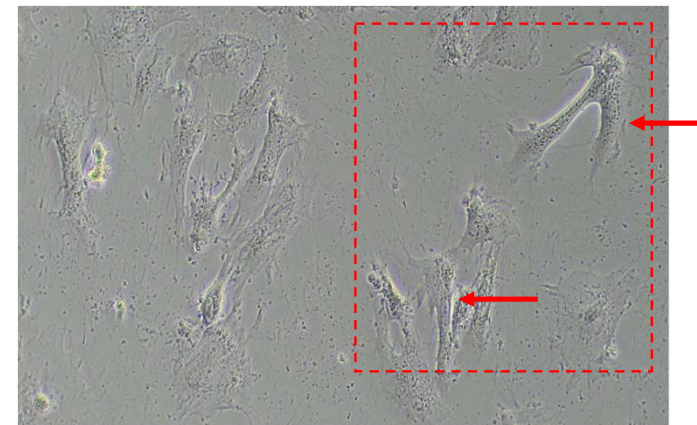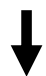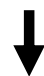

20 min

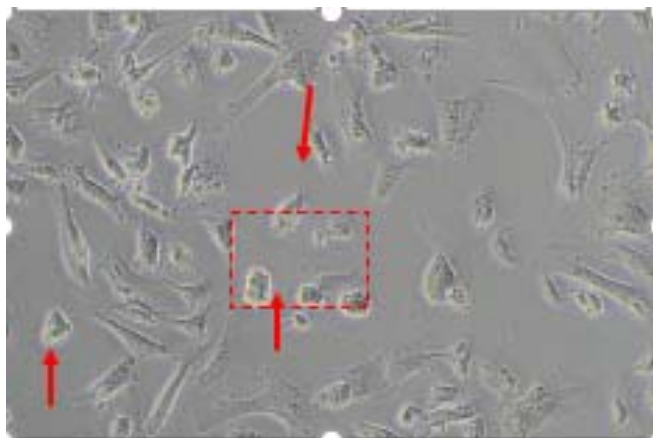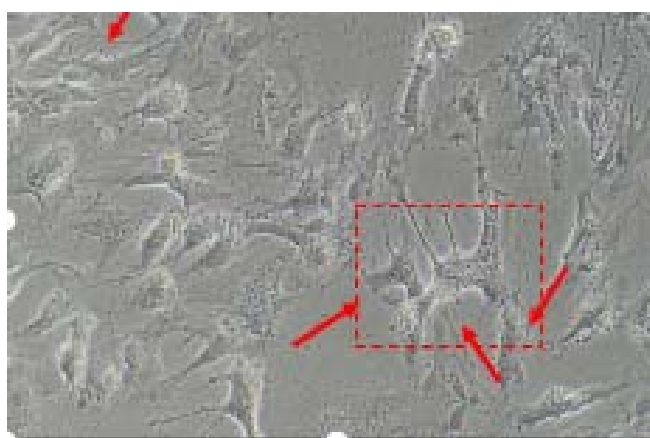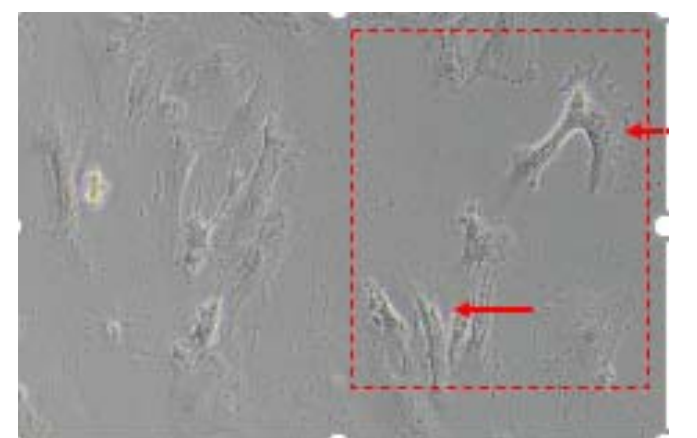

Supplement: s1 [file s1]
